# Supplementary material for: 1D/2D nitrogen-doped carbon nanorod arrays/ultrathin carbon nanosheets: outstanding catalysts for the highly efficient electroreduction of CO2 to CO
Source: Royal Society of Chemistry journal article supplement (doi:10.1039/c9ta02353d), 2019-01-01
Supplement: c9ta02353d1.pdf [file c9ta02353d1.pdf]

## Supporting Information

### 1D/2D nitrogen-doped carbon nanorod arrays/ultrathin carbon nanosheets: outstanding catalysts for highly efficient electroreduction CO<sub>2</sub> to CO

Ying zhu,<sup>a</sup> Kulin Lv,<sup>a</sup> Xingpu Wang,<sup>a</sup> Hequn Yang,<sup>a</sup> Guozheng Xiao,<sup>a</sup> Ying Zhu\*<sup>ab</sup>

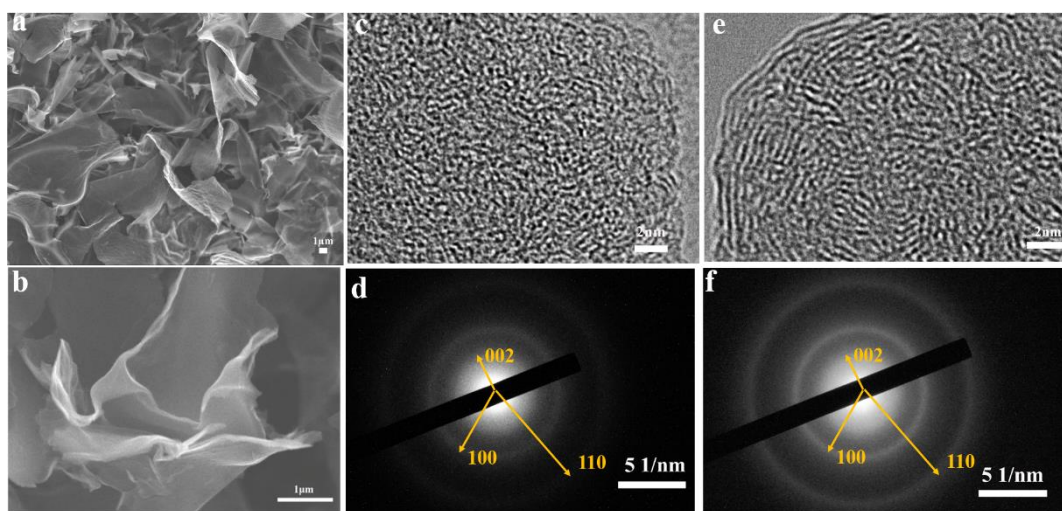

**Fig. S1** (a, b) SEM images of CS, (c, e) HRTEM images of the 1D/2D NR/CS-800, 1D/2D NR/CS-1000, (d, f) SAED of the 1D/2D NR/CS-800, 1D/2D NR/CS-1000.

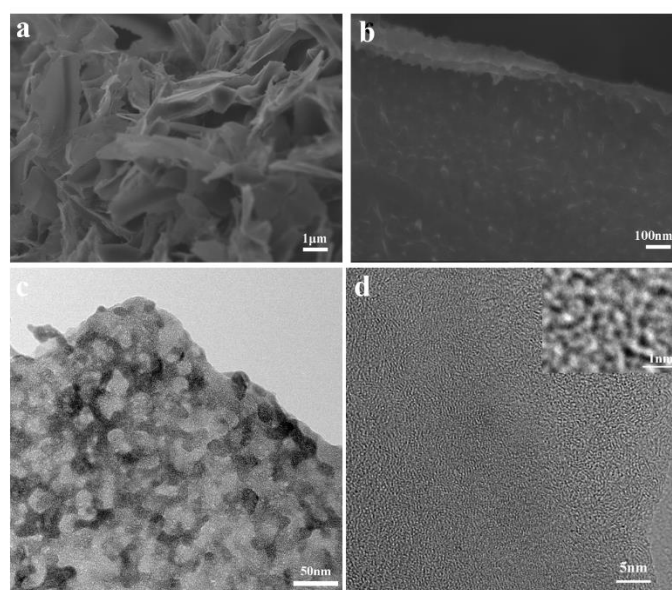

**Fig. S2** (a, b) ESEM, (c) STEM and (d) HRTEM images of 1D/2D NR/CS-900 after 30 h stability test in CO<sub>2</sub>-saturated 0.5 M KHCO<sub>3</sub> at -0.45 V.

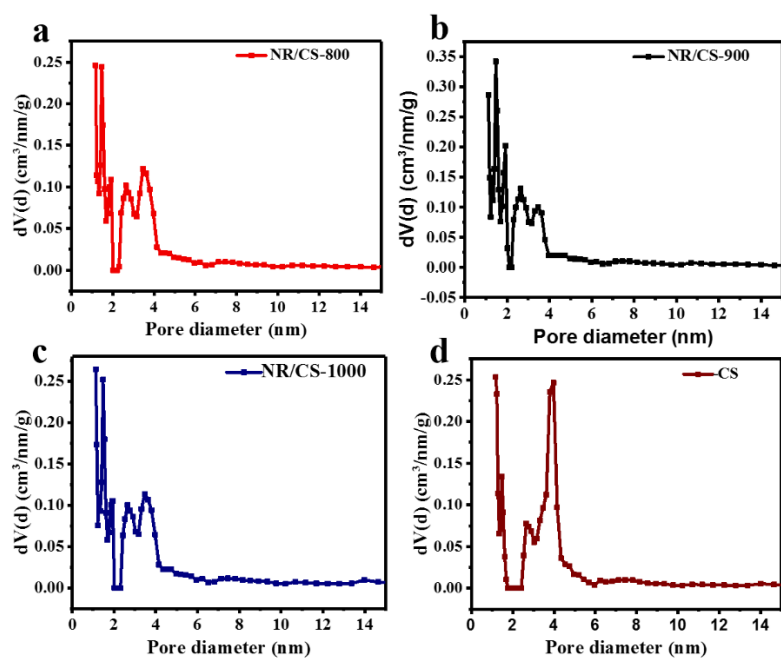

**Fig. S3** (a-d) Pore size distributions of 1D/2D NR/CS-X and CS calculated from the N<sub>2</sub> adsorption isotherms by the BJH method using a slit pore model.

**Table S1.** SSA and  $I_D/I_G$  ratios of 1D/2D NR/CS-X and CS.

| Samples                | NR/CS-800 | NR/CS-900 | NR/CS-1000 | CS     |
|------------------------|-----------|-----------|------------|--------|
| SSA(m <sup>2</sup> /g) | 741.93    | 859.97    | 743.45     | 689.68 |
| $I_D/I_G$              | 1.04      | 1.17      | 1.07       | 0.97   |

**Table S2.** Atomic percentage (at %) of different N species in 1D/2D NR/CS-X.

| Samples     | Pyridinic N | Pyrrolic N | Graphitic N | Oxidized N | Total |
|-------------|-------------|------------|-------------|------------|-------|
| NR/CS -800  | 1.31        | 1.60       | 2.16        | 0.72       | 5.79  |
| NR/CS -900  | 1.49        | 0.88       | 2.07        | 0.86       | 5.30  |
| NR/CS -1000 | 0.52        | 0.72       | 1.11        | 0.93       | 3.28  |

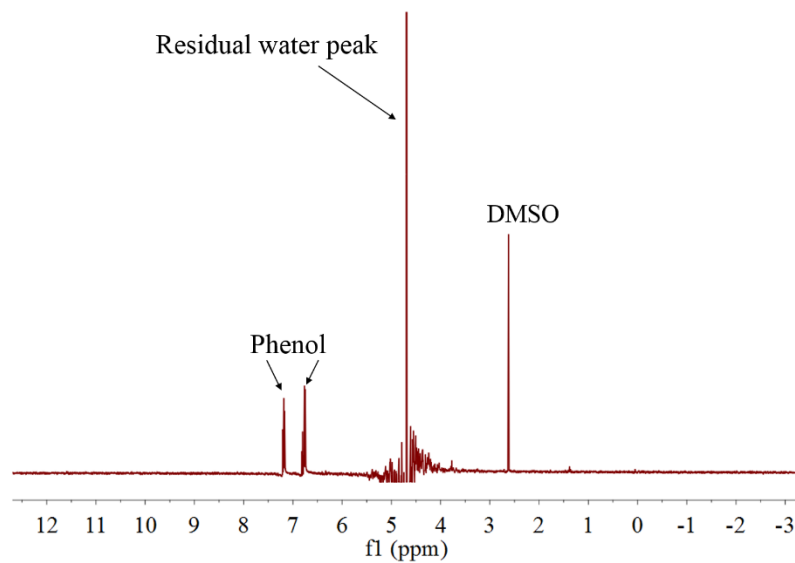

**Fig. S4** The <sup>1</sup>H NMR spectrum of the 0.5M KHCO<sub>3</sub> solution on 1D/2D NR/CS-X. Potential applied = -0.35-0.95 V (vs RHE).

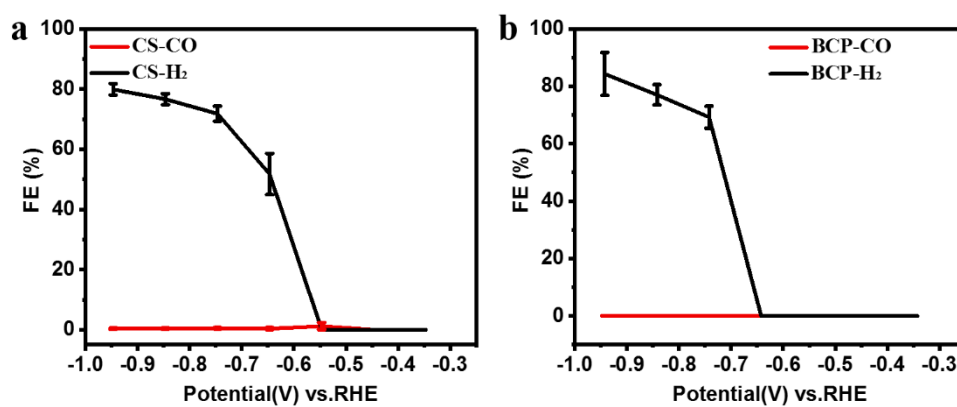

**Fig. S5** (a, b) FEs of CO and H<sub>2</sub> at different applied potentials for CS, Blank carbon paper (BCP, MGL190), respectively.

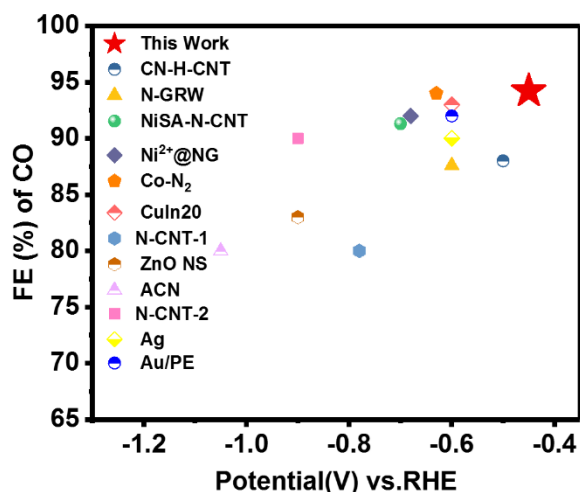

**Fig. S6** Comparison of potentials and FE of formation of CO on 1D/2D NR/CS-900 with other electrocatalysts reported in the recently literatures.

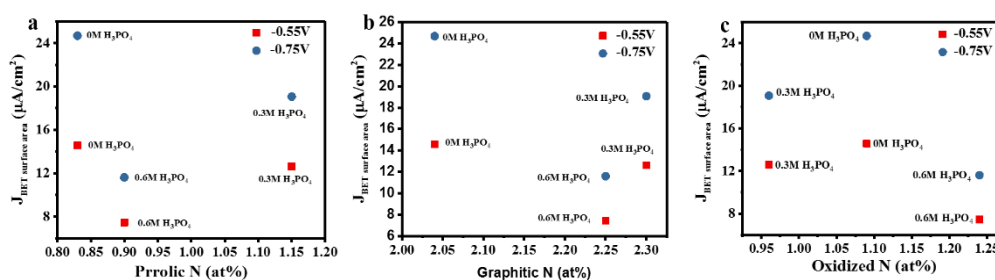

**Fig. S7** The relationship between the CO normalized partial current density and contents of the pyrrolic N (a), graphitic N (b), oxidized N (c) in 1D/2D NR/CS-900 (YM H<sub>3</sub>PO<sub>4</sub>) at -0.55 and -0.75 V. 1D/2D NR/CS-900 (YM H<sub>3</sub>PO<sub>4</sub>) represents NR/CS-900 being soaked in Y M H<sub>3</sub>PO<sub>4</sub> solution for 3 h. The full-filled blue circles and the full-filled red square represent 1D/2D NR/CS-900 (0 M H<sub>3</sub>PO<sub>4</sub>), 1D/2D NR/CS-900 (0.3 M H<sub>3</sub>PO<sub>4</sub>) and 1D/2D NR/CS-900 (0.6 M H<sub>3</sub>PO<sub>4</sub>) at -0.55 and -0.75 V from right to left, respectively.

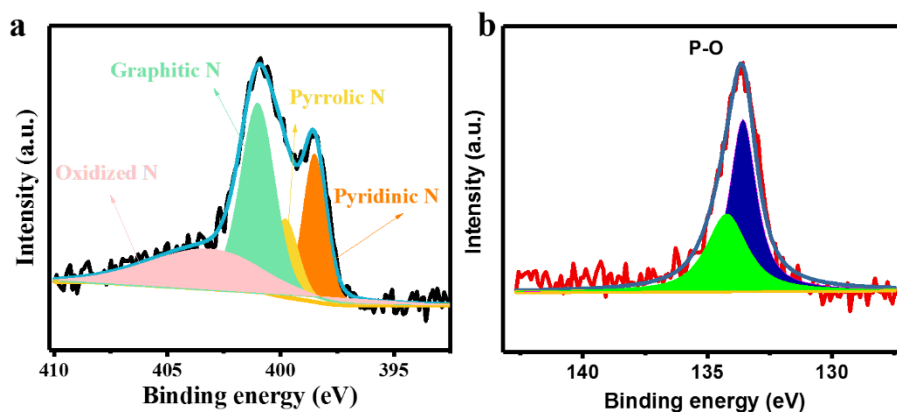

Fig. S8 (a, b) N1s and P 2p XPS spectra of 1D/2D NR/CS-900 (0.3 M H<sub>3</sub>PO<sub>4</sub>).

Table S3 Atomic percentage (at %) of different nitrogen 1D/2D NR/CS-900 (Y M H<sub>3</sub>PO<sub>4</sub>).

| Samples                                           | Pyridinic N | Pyrrolic N | Graphitic N | Oxidized N | Total |
|---------------------------------------------------|-------------|------------|-------------|------------|-------|
| NR/CS-900 (0 M H <sub>3</sub> PO <sub>4</sub> )   | 1.49        | 0.88       | 2.07        | 0.86       | 5.30  |
| NR/CS-900 (0.3 M H <sub>3</sub> PO <sub>4</sub> ) | 1.20        | 0.76       | 2.29        | 1.48       | 5.73  |
| NR/CS-900 (0.6 M H <sub>3</sub> PO <sub>4</sub> ) | 1.14        | 0.90       | 2.22        | 1.34       | 5.6   |

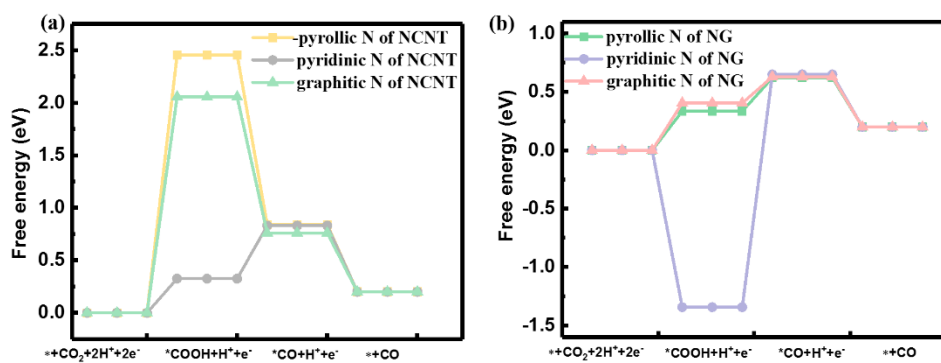

Fig. S9 (a, b) Free energy diagrams of CO<sub>2</sub>RR on NCNT and NG catalysts.

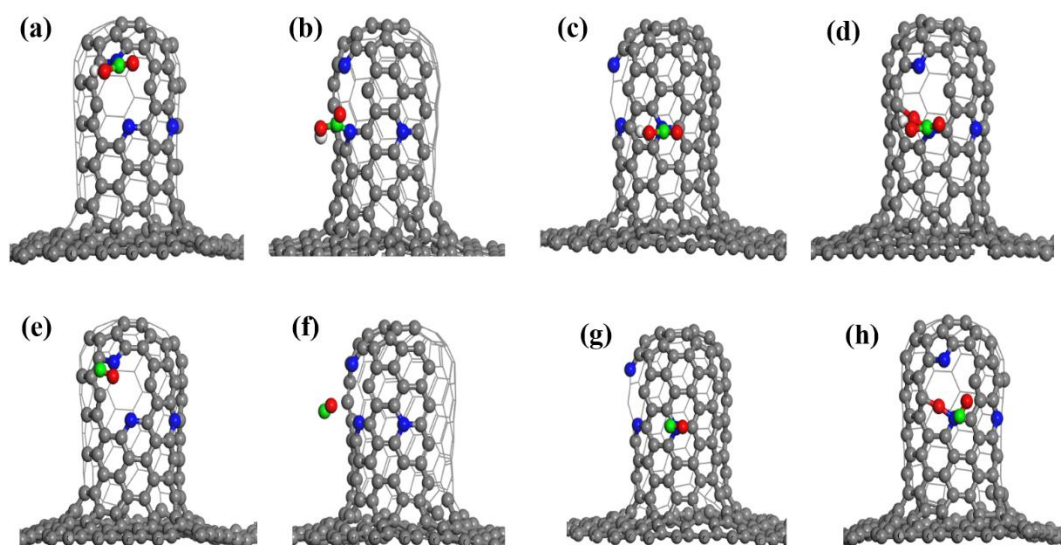

**Fig. S10** Optimized configurations of 1D/2D NR/CS-X catalysts. The ground state configurations of \*COOH intermediate adsorbed on active sites of (a) pyrrolic N, (b) pyridinic N, (c) graphitic N and (d) oxidized N. The ground state configurations of intermediate \*CO adsorbed on active sites (e) pyrrolic N, (f) pyridinic N and (g) graphitic N and (h) oxidized N. The balls colored in green, blue, red, and white represent C, N, O, and H atoms, respectively.

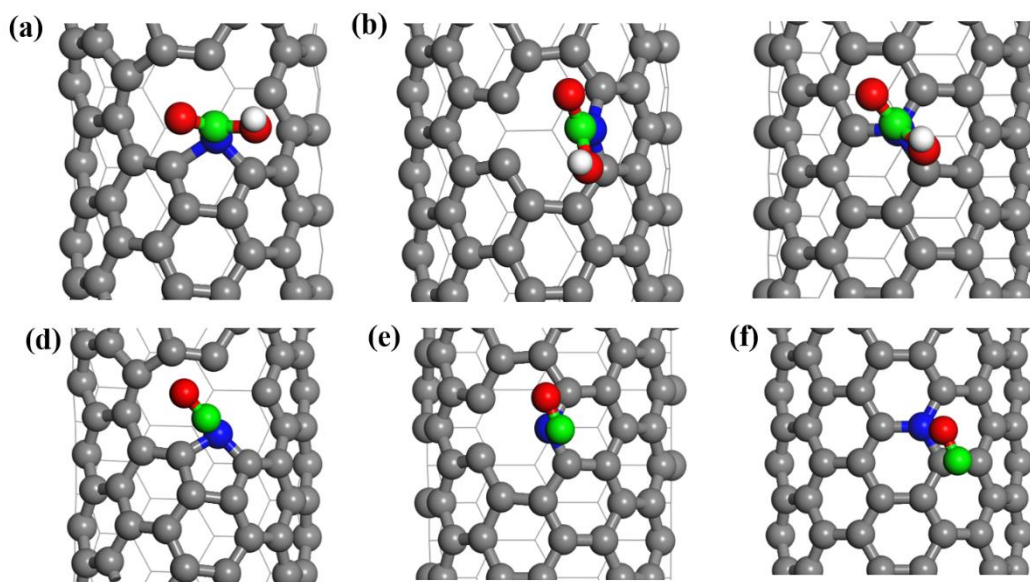

**Fig. S11** Optimized configuration of NCNT. The ground state configurations of COOH intermediate adsorbed on active sites of (a) pyrrolic N, (b) pyridinic N, (c) graphitic N. The ground state configurations of CO intermediate adsorbed on active sites (d) pyrrolic N, (e) pyridinic N and (f) graphitic N. The balls colored in green, blue, red, and white represent C, N, O, and H atoms, respectively.

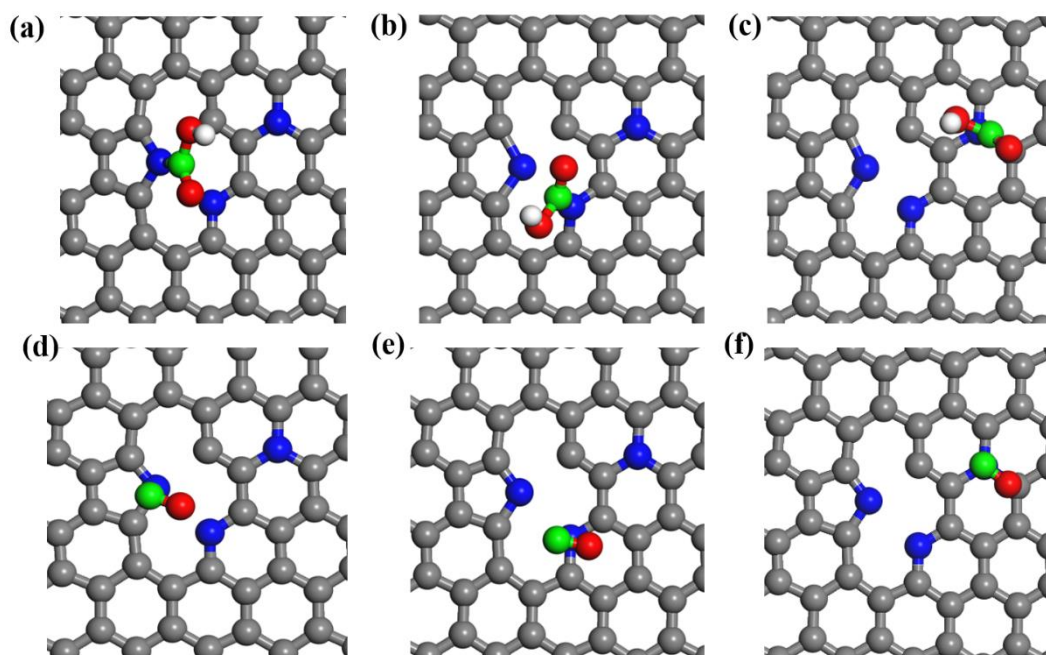

**Fig. S12** Optimized configuration of NG. The ground state configurations of COOH intermediate adsorbed on active sites of (a) pyrrolic N, (b) pyridinic N, (c) graphitic N. The ground state configurations of CO intermediate adsorbed on active sites of (d) pyrrolic N, (e) pyridinic N, (f) graphitic N. The balls colored in green, blue, red, and white represent C, N, O, and H atoms, respectively.

**Table S4** Bond length ( $\text{\AA}$ ) between COOH intermediate and pyrrolic N, pyridinic N, graphitic N and oxidized N.

| Bond length( $\text{\AA}$ ) | Pyrrolic N-C | Pyridinic N-C | Graphitic N-C | Oxidized N-C |
|-----------------------------|--------------|---------------|---------------|--------------|
| 1D/2D NR/CS-X               | 1.431        | 1.443         | 1.640         | 1.443        |
| NCNT                        | 1.546        | 1.430         | 1.583         | -----        |
| NG                          | 1.394        | 1.402         | 3.257         | -----        |

Table S5. The details about the energy (eV) employed in free energy.

| Materials        | N Species   | Intermediate | E <sub>DFT</sub> | E <sub>ZPE</sub> | TΔS  | G        |         |
|------------------|-------------|--------------|------------------|------------------|------|----------|---------|
| NCNT             | Pyrrolic N  | COOH*        | -875.88          | 0.76             | 0.34 | -875.46  |         |
|                  |             | CO*          | -866.55          | 0.21             | 0.16 | -866.52  |         |
|                  | Pyridinic N | COOH*        | -886.76          | 0.69             | 0.27 | -886.34  |         |
|                  |             | CO*          | -875.29          | 0.27             | 0.24 | -875.26  |         |
|                  | Graphitic N | COOH*        | -897.78          | 0.67             | 0.27 | -897.38  |         |
|                  |             | CO*          | -888.02          | 0.25             | 0.33 | -888.10  |         |
| 1D/2D<br>NR/CS-X | Pyrrolic N  | COOH*        | -2102.75         | 0.61             | 0.20 | -2102.34 |         |
|                  |             | CO*          | -2090.56         | 0.17             | 0.34 | -2090.73 |         |
|                  | Pyridinic N | COOH*        | -2102.01         | 0.66             | 0.24 | -2101.59 |         |
|                  |             | CO*          | -2090.56         | 0.15             | 0.31 | -2090.72 |         |
|                  | Graphitic N | COOH*        | -2101.32         | 0.67             | 0.21 | -2100.86 |         |
|                  |             | CO*          | -2090.56         | 0.16             | 0.29 | -2090.69 |         |
|                  | Oxidized N  | COOH*        | -2110.75         | 0.75             | 0.30 | -2110.3  |         |
|                  |             | CO*          | -2098.97         | 0.27             | 0.34 | -2099.04 |         |
|                  | NG          | Pyrrolic N   | COOH*            | -302.18          | 0.66 | 0.21     | -301.73 |
|                  |             |              | CO*              | -290.69          | 0.15 | 0.33     | -305.08 |
| Pyridinic N      |             | COOH*        | -305.57          | 0.66             | 0.17 | -886.34  |         |
|                  |             | CO*          | -290.68          | 0.16             | 0.32 | -875.26  |         |
| Graphitic N      |             | COOH*        | -301.83          | 0.55             | 0.38 | -301.66  |         |
|                  |             | CO*          | -290.66          | 0.15             | 0.35 | -290.86  |         |

Table S6 Free energy (eV) corrections for species.

| Species          | E <sub>DFT</sub> | E <sub>ZPE</sub> | TΔS  | G      |
|------------------|------------------|------------------|------|--------|
| H <sub>2</sub> O | -14.21           | 0.56             | 0.67 | -14.32 |
| CO <sub>2</sub>  | -22.95           | 0.31             | 0.66 | -22.85 |
| CO               | -14.79           | 0.13             | 0.60 | -15.26 |
| *CO              | -                | 0.19             | 0.12 | 0.07   |
| *COOH            | -                | 0.61             | 0.16 | 0.45   |
| H <sub>2</sub>   | -6.76            | 0.27             | 0.40 | -6.98  |



**Table S7** Free energy (eV) of CO<sub>2</sub> electroreduction reactions for the NR/CS-X, NCNT and NG.

| Materials     | N Species   | $\Delta G(*\text{COOH})$ | $\Delta G(*\text{CO})$ |
|---------------|-------------|--------------------------|------------------------|
| 1D/2D NR/CS-X | Pyrrolic N  | -0.525                   | 1.035                  |
|               | Pyridinic N | 0.225                    | 0.295                  |
|               | Graphitic N | 0.955                    | -0.405                 |
|               | Oxidized N  | -1.445                   | 0.685                  |
| NCNT          | Pyrrolic N  | 2.455                    | -1.615                 |
|               | Pyridinic N | 0.325                    | 0.505                  |
|               | Graphitic N | 2.055                    | -1.295                 |
| NG            | Pyrrolic N  | 0.335                    | 0.285                  |
|               | Pyridinic N | -1.345                   | 1.995                  |
|               | Graphitic N | 0.405                    | 0.225                  |
